# Supplementary material for: Online Mindfulness-Based Intervention Program Improves Mental Health, Well-Being, and Productivity
Source: Springer Nature journal article supplement (doi:10.1007/s12671-024-02344-3), 2024-04-01
Supplement: MOESM1 [file 26940636]

**Supplementary material for**

**Online Mindfulness-Based Intervention Program Improves Mental Health, Well-Being, and Productivity**

**Supplementary Table S1: Attrition analysis between completer and dropout**

|  | **Completer** | | |  | **Dropout** | | |  | **P-value** |
| --- | --- | --- | --- | --- | --- | --- | --- | --- | --- |
|  | A | B | Total (A+B) |  | A | B | Total (A+B) |  | Completer vs. Dropout [Total] |
| **Sex** |  |  |  |  |  |  |  |  | **0.793** |
| Male | 42 | 54 | 96 |  | 27 | 17 | 44 |  |  |
| Female | 56 | 57 | 113 |  | 24 | 22 | 46 |  |  |
| other | 1 | 0 | 1 |  | 0 | 0 | 0 |  |  |
| **Industry** |  |  |  |  |  |  |  |  | **0.209** |
| General companies | 48 | 68 | 116 |  | 35 | 20 | 55 |  |  |
| Medical and Welfare | 30 | 32 | 62 |  | 11 | 7 | 18 |  |  |
| Education | 21 | 11 | 32 |  | 5 | 12 | 17 |  |  |

P-value: Fisher's exact test

**Supplementary Table S2:** **The mean score comparison between the intervention and control groupsa**

|  |  | **Intervention (Group A; n = 99)** | | | | |  |  | **Control (Group B: n = 111)** | | | | |  |  | P-value | |  |
| --- | --- | --- | --- | --- | --- | --- | --- | --- | --- | --- | --- | --- | --- | --- | --- | --- | --- | --- |
|  |  | Mean | 95%CI | | | P-value (vs. PRE) | |  | Mean | 95%CI | | | P-value (vs. PRE) | |  | ( vs. Control） | | *d* |
| **FFMQ** |  |  |  |  |  |  |  |  |  |  |  |  |  |  |  |  |  |  |
|  | PRE | 109.5 | 107.4 | , | 111.6 | - |  |  | 110.1 | 108.1 | , | 112.1 | - |  |  | 0.100 |  | 0.05 |
|  | INTER(4w) | 111.2 | 109.1 | , | 113.3 | - |  |  | 109.8 | 107.8 | , | 111.8 | - |  |  | 0.694 |  | 0.13 |
|  | POST(8w) | 113.6 | 111.5 | , | 115.7 | - |  |  | 111.2 | 109.2 | , | 113.1 | - |  |  | 0.345 |  | 0.23 |
|  |  |  |  |  |  |  |  |  |  |  |  |  |  |  |  |  |  |  |
|  | Δ 4w | 1.7 | 0.0 | , | 3.3 | 0.055 |  |  | -0.3 | -1.9 | , | 1.3 | 0.714 |  |  | 0.099 |  | 0.23 |
|  | Δ 8w | 4.1 | 2.4 | , | 5.8 | **0.000** | ****** |  | 1.1 | -0.5 | , | 2.7 | 0.184 |  |  | **0.012** | * | 0.35 |
|  |  |  |  |  |  |  |  |  |  |  |  |  |  |  |  |  |  |  |
| Observing | |  |  |  |  |  |  |  |  |  |  |  |  |  |  |  |  |  |
|  | PRE | 22.4 | 21.5 | , | 23.4 | - |  |  | 23.0 | 22.1 | , | 23.9 | - |  |  | 0.370 |  | 0.12 |
|  | INTER(4w) | 23.0 | 22.1 | , | 24.0 | - |  |  | 23.3 | 22.4 | , | 24.1 | - |  |  | 0.748 |  | 0.04 |
|  | POST(8w) | 24.6 | 23.6 | , | 25.5 | - |  |  | 23.1 | 22.2 | , | 24.0 | - |  |  | 0.023 |  | 0.31 |
|  |  |  |  |  |  |  |  |  |  |  |  |  |  |  |  |  |  |  |
|  | Δ 4w | 0.6 | -0.1 | , | 1.3 | 0.091 |  |  | 0.2 | -0.4 | , | 0.9 | 0.515 |  |  | 0.433 |  | 0.11 |
|  | Δ 8w | 2.1 | 1.5 | , | 2.8 | **0.000** | ****** |  | 0.0 | -0.6 | , | 0.7 | 0.892 |  |  | **0.000** | ** | 0.60 |
|  |  |  |  |  |  |  |  |  |  |  |  |  |  |  |  |  |  |  |
| Nonreact | |  |  |  |  |  |  |  |  |  |  |  |  |  |  |  |  |  |
|  | PRE | 21.2 | 20.5 | , | 21.9 | - |  |  | 21.2 | 20.5 | , | 21.8 | - |  |  | 0.966 |  | 0.01 |
|  | INTER(4w) | 21.2 | 20.5 | , | 21.9 | - |  |  | 21.0 | 20.3 | , | 21.6 | - |  |  | 0.662 |  | 0.06 |
|  | POST(8w) | 22.1 | 21.4 | , | 22.8 | - |  |  | 21.8 | 21.2 | , | 22.5 | - |  |  | 0.531 |  | 0.09 |
|  |  |  |  |  |  |  |  |  |  |  |  |  |  |  |  |  |  |  |
|  | Δ 4w | 0.0 | -0.6 | , | 0.6 | 0.974 |  |  | -0.2 | -0.8 | , | 0.4 | 0.538 |  |  | 0.655 |  | 0.06 |
|  | Δ 8w | 0.9 | 0.3 | , | 1.5 | **0.003** | ****** |  | 0.7 | 0.1 | , | 1.2 | **0.025** | ***** |  | 0.508 |  | 0.09 |
|  |  |  |  |  |  |  |  |  |  |  |  |  |  |  |  |  |  |  |
| Nonjudgment | |  |  |  |  |  |  |  |  |  |  |  |  |  |  |  |  |  |
|  | PRE | 18.8 | 17.9 | , | 19.7 | - |  |  | 19.2 | 18.3 | , | 20.0 | - |  |  | 0.533 |  | 0.09 |
|  | INTER(4w) | 18.7 | 17.8 | , | 19.6 | - |  |  | 19.1 | 18.3 | , | 20.0 | - |  |  | 0.456 |  | 0.10 |
|  | POST(8w) | 18.1 | 17.3 | , | 19.0 | - |  |  | 18.8 | 17.9 | , | 19.6 | - |  |  | 0.296 |  | 0.14 |
|  |  |  |  |  |  |  |  |  |  |  |  |  |  |  |  |  |  |  |
|  | Δ 4w | -0.1 | -0.8 | , | 0.6 | 0.741 |  |  | 0.0 | -0.7 | , | 0.6 | 0.910 |  |  | 0.871 |  | 0.02 |
|  | Δ 8w | -0.7 | -1.3 | , | 0.0 | 0.052 |  |  | -0.4 | -1.0 | , | 0.2 | 0.213 |  |  | 0.574 |  | 0.08 |
|  |  |  |  |  |  |  |  |  |  |  |  |  |  |  |  |  |  |  |
| Describing | |  |  |  |  |  |  |  |  |  |  |  |  |  |  |  |  |  |
|  | PRE | 22.7 | 22.2 | , | 23.2 | - |  |  | 22.3 | 21.9 | , | 22.8 | - |  |  | 0.268 |  | 0.15 |
|  | INTER(4w) | 22.5 | 22.0 | , | 23.0 | - |  |  | 22.1 | 21.7 | , | 22.6 | - |  |  | 0.340 |  | 0.13 |
|  | POST(8w) | 23.1 | 22.6 | , | 23.6 | - |  |  | 22.6 | 22.2 | , | 23.1 | - |  |  | 0.215 |  | 0.17 |
|  |  |  |  |  |  |  |  |  |  |  |  |  |  |  |  |  |  |  |
|  | Δ 4w | -0.3 | -0.7 | , | 0.2 | 0.303 |  |  | -0.2 | -0.7 | , | 0.3 | 0.392 |  |  | 0.872 |  | 0.02 |
|  | Δ 8w | 0.4 | -0.1 | , | 0.8 | 0.149 |  |  | 0.3 | -0.1 | , | 0.8 | 0.186 |  |  | 0.888 |  | 0.02 |
|  |  |  |  |  |  |  |  |  |  |  |  |  |  |  |  |  |  |  |
| Awareness | |  |  |  |  |  |  |  |  |  |  |  |  |  |  |  |  |  |
|  | PRE | 21.3 | 20.3 | , | 22.2 | - |  |  | 21.3 | 20.3 | , | 22.2 | - |  |  | 0.986 |  | 0.00 |
|  | INTER(4w) | 22.9 | 21.9 | , | 23.9 | - |  |  | 21.4 | 20.4 | , | 22.3 | - |  |  | 0.024 |  | 0.31 |
|  | POST(8w) | 22.7 | 21.8 | , | 23.7 | - |  |  | 21.9 | 20.9 | , | 22.8 | - |  |  | 0.199 |  | 0.18 |
|  |  |  |  |  |  |  |  |  |  |  |  |  |  |  |  |  |  |  |
|  | Δ 4w | 1.6 | 0.9 | , | 2.3 | **0.000** | ****** |  | 0.1 | -0.5 | , | 0.7 | 0.761 |  |  | **0.001** | ** | 0.44 |
|  | Δ 8w | 1.5 | 0.8 | , | 2.1 | **0.000** | ****** |  | 0.6 | 0.0 | , | 1.2 | 0.068 |  |  | 0.070 |  | 0.25 |
|  |  |  |  |  |  |  |  |  |  |  |  |  |  |  |  |  |  |  |
| **GHQ-12** |  |  |  |  |  |  |  |  |  |  |  |  |  |  |  |  |  |  |
|  | PRE | 4.0 | 3.4 | , | 4.6 | - |  |  | 4.4 | 3.8 | , | 4.9 | - |  |  | 0.402 |  | 0.12 |
|  | INTER(4w) | 2.5 | 1.9 | , | 3.1 | - |  |  | 3.8 | 3.2 | , | 4.3 | - |  |  | 0.002 |  | 0.42 |
|  | POST(8w) | 1.8 | 1.2 | , | 2.4 | - |  |  | 3.6 | 3.1 | , | 4.2 | - |  |  | 0.000 |  | 0.61 |
|  |  |  |  |  |  |  |  |  |  |  |  |  |  |  |  |  |  |  |
|  | Δ 4w | -1.5 | -2.0 | , | -0.9 | **0.000** | ****** |  | -0.6 | -1.1 | , | 0.0 | **0.037** | ***** |  | **0.020** | * | 0.32 |
|  | Δ 8w | -2.2 | -2.7 | , | -1.6 | **0.000** | ****** |  | -0.7 | -1.2 | , | -0.2 | **0.008** | ****** |  | **0.000** | ** | 0.52 |
|  |  |  |  |  |  |  |  |  |  |  |  |  |  |  |  |  |  |  |
| **SWLS** |  |  |  |  |  |  |  |  |  |  |  |  |  |  |  |  |  |  |
|  | PRE | 22.4 | 21.4 | , | 23.4 | - |  |  | 21.8 | 20.8 | , | 22.8 | - |  |  | 0.401 |  | 0.12 |
|  | INTER(4w) | 23.2 | 22.2 | , | 24.3 | - |  |  | 21.9 | 20.9 | , | 22.9 | - |  |  | 0.078 |  | 0.24 |
|  | POST(8w) | 24.1 | 23.1 | , | 25.2 | - |  |  | 21.7 | 20.8 | , | 22.7 | - |  |  | 0.001 |  | 0.45 |
|  |  |  |  |  |  |  |  |  |  |  |  |  |  |  |  |  |  |  |
|  | Δ 4w | 0.8 | 0.1 | , | 1.5 | **0.032** | ***** |  | 0.1 | -0.6 | , | 0.8 | 0.703 |  |  | 0.193 |  | 0.18 |
|  | Δ 8w | 1.7 | 1.0 | , | 2.4 | **0.000** | ****** |  | -0.1 | -0.8 | , | 0.6 | 0.879 |  |  | **0.001** | ** | 0.47 |
|  |  |  |  |  |  |  |  |  |  |  |  |  |  |  |  |  |  |  |
| **SIPQ** |  |  |  |  |  |  |  |  |  |  |  |  |  |  |  |  |  |  |
|  | PRE | 75.5 | 71.9 |  | 79.2 | - |  |  | 74.4 | 70.9 |  | 77.8 | - |  |  | 0.649 |  | 0.06 |
|  | INTER(4w) | 76.5 | 72.8 |  | 80.1 | - |  |  | 74.3 | 70.9 |  | 77.7 | - |  |  | 0.391 |  | 0.12 |
|  | POST(8w) | 79.3 | 75.7 |  | 82.9 | - |  |  | 74.1 | 70.7 |  | 77.5 | - |  |  | 0.041 |  | 0.28 |
|  |  |  |  |  |  |  |  |  |  |  |  |  |  |  |  |  |  |  |
|  | Δ 4w | 0.9 | -2.4 | , | 4.3 | 0.575 |  |  | -0.1 | -3.2 | , | 3.1 | 0.964 |  |  | 0.661 |  | 0.06 |
|  | Δ 8w | 3.8 | 0.5 | , | 7.1 | **0.026** | ***** |  | -0.3 | -3.4 | , | 2.9 | 0.861 |  |  | 0.082 |  | 0.24 |
|  |  |  |  |  |  |  |  |  |  |  |  |  |  |  |  |  |  |  |

aThe effects of the intervention were measured and compared to the controls after 4 weeks and 8 weeks. The FFMQ subscales were also included.

**p* < 0.05 and **p* < 0.01 compared to PRE or control group.

**Supplementary Table S3. The pre-and post-comparison of the intervention effect in groups A and Bb**

|  |  | **Intervention (A+B: n=168)** | | | | |  |  |
| --- | --- | --- | --- | --- | --- | --- | --- | --- |
|  |  | mean | 95%CI | | | P-value (vs. PRE) | | *d* |
| **FFMQ** |  |  |  |  |  |  |  |  |
|  | PRE | 114.57 | 112.22 | , | 116.92 | - |  |  |
|  | INTER(4w) | 116.77 | 114.43 | , | 119.12 | - |  |  |
|  | POST(8w) | 119.83 | 117.48 | , | 122.17 | - |  |  |
|  |  |  |  |  |  |  |  |  |
|  | Δ 4w | 2.20 | 0.74 | , | 3.67 | 0.003 | ** | 0.23 |
|  | Δ 8w | 5.26 | 3.79 | , | 6.72 | 0.000 | ** | 0.54 |
|  |  |  |  |  |  |  |  |  |
| **Observing** | PRE | 22.7 | 22.0 | , | 23.4 | - |  |  |
|  | INTER(4w) | 23.6 | 22.9 | , | 24.4 | - |  |  |
|  | POST(8w) | 25.0 | 24.3 | , | 25.8 | - |  |  |
|  |  |  |  |  |  |  |  |  |
|  | Δ 4w | 0.9 | 0.4 | , | 1.5 | 0.001 | ** | 0.25 |
|  | Δ 8w | 2.3 | 1.8 | , | 2.9 | 0.000 | ** | 0.62 |
|  |  |  |  |  |  |  |  |  |
| **Nonreact** | PRE | 21.2 | 20.7 | , | 21.8 | - |  |  |
|  | INTER(4w) | 21.8 | 21.3 | , | 22.3 | - |  |  |
|  | POST(8w) | 22.5 | 22.0 | , | 23.1 | - |  |  |
|  |  |  |  |  |  |  |  |  |
|  | Δ 4w | 0.6 | 0.1 | , | 1.1 | 0.016 | * | 0.19 |
|  | Δ 8w | 1.3 | 0.8 | , | 1.8 | 0.000 | ** | 0.42 |
|  |  |  |  |  |  |  |  |  |
| **Nonjudging** | PRE | 20.3 | 19.6 | , | 21.1 | - |  |  |
|  | INTER(4w) | 20.7 | 19.9 | , | 21.4 | - |  |  |
|  | POST(8w) | 20.7 | 19.9 | , | 21.4 | - |  |  |
|  |  |  |  |  |  |  |  |  |
|  | Δ 4w | 0.3 | -0.2 | , | 0.9 | 0.234 |  | 0.09 |
|  | Δ 8w | 0.3 | -0.2 | , | 0.9 | 0.217 |  | 0.10 |
|  |  |  |  |  |  |  |  |  |
| **Describing** | PRE | 23.5 | 22.8 | , | 24.2 | - |  |  |
|  | INTER(4w) | 23.6 | 22.9 | , | 24.3 | - |  |  |
|  | POST(8w) | 24.2 | 23.5 | , | 24.9 | - |  |  |
|  |  |  |  |  |  |  |  |  |
|  | Δ 4w | 0.2 | -0.3 | , | 0.6 | 0.446 |  | 0.06 |
|  | Δ 8w | 0.7 | 0.3 | , | 1.2 | 0.001 | ** | 0.25 |
|  |  |  |  |  |  |  |  |  |
| **Awareness** | PRE | 23.8 | 23.0 | , | 24.7 | - |  |  |
|  | INTER(4w) | 24.0 | 23.2 | , | 24.8 | - |  |  |
|  | POST(8w) | 24.3 | 23.5 | , | 25.1 | - |  |  |
|  |  |  |  |  |  |  |  |  |
|  | Δ 4w | 0.2 | -0.4 | , | 0.7 | 0.580 |  | 0.04 |
|  | Δ 8w | 0.5 | -0.1 | , | 1.0 | 0.102 |  | 0.13 |
|  |  |  |  |  |  |  |  |  |
| **GHQ-12** |  |  |  |  |  |  |  |  |
|  | PRE | 4.25 | 3.86 | , | 4.65 | - |  |  |
|  | INTER(4w) | 3.01 | 2.61 | , | 3.40 | - |  |  |
|  | POST(8w) | 2.48 | 2.09 | , | 2.88 | - |  |  |
|  |  |  |  |  |  |  |  |  |
|  | Δ 4w | -1.2 | -1.7 | , | -0.8 | 0.000 | ** | -0.47 |
|  | Δ 8w | -1.8 | -2.2 | , | -1.4 | 0.000 | ** | -0.66 |
|  |  |  |  |  |  |  |  |  |
| **SWLS** |  |  |  |  |  |  |  |  |
|  | PRE | 22.65 | 21.84 | , | 23.45 | - |  |  |
|  | INTER(4w) | 23.25 | 22.45 | , | 24.05 | - |  |  |
|  | POST(8w) | 23.99 | 23.19 | , | 24.80 | - |  |  |
|  |  |  |  |  |  |  |  |  |
|  | Δ 4w | 0.60 | 0.05 | , | 1.15 | 0.031 | * | 0.17 |
|  | Δ 8w | 1.35 | 0.80 | , | 1.89 | 0.000 | ** | 0.37 |
|  |  |  |  |  |  |  |  |  |
| **SIPQ** |  |  |  |  |  |  |  |  |
|  | PRE | 75.20 | 72.54 | , | 77.86 | - |  |  |
|  | INTER(4w) | 75.92 | 73.26 | , | 78.58 | - |  |  |
|  | POST(8w) | 79.99 | 77.33 | , | 82.65 | - |  |  |
|  |  |  |  |  |  |  |  |  |
|  | Δ 4w | 0.72 | -2.01 | , | 3.46 | 0.604 |  | 0.04 |
|  | Δ 8w | 4.79 | 2.05 | , | 7.53 | 0.001 | ** | 0.26 |
|  |  |  |  |  |  |  |  |  |

bThe intervention effects INTER(4w) and POST(8w) were compared to the PRE score. The FFMQ subscales were also included. Δ means the amount of change from PRE.

**p* < 0.05 and **p* < 0.01 compared to PRE score

**Supplementary Table S4: The stratified analysis by the presence or absence of the impact of COVID-19c**

|  |  |  | **Intervention (n = 86)** | | | | |  |  | **Control (n = 82)** | | | | |  | P-value | |  |
| --- | --- | --- | --- | --- | --- | --- | --- | --- | --- | --- | --- | --- | --- | --- | --- | --- | --- | --- |
|  |  |  | mean | 95%CI | | | P-value (vs. PRE) | |  | mean | 95%CI | | | P-value (vs. PRE) | | ( vs. Control） | | *d* |
| **FFMQ** |  |  |  |  |  |  |  |  |  |  |  |  |  |  |  |  |  |  |
| Affected |  | PRE | 109.0 | 106.8 |  | 111.2 | - |  |  | 109.8 | 107.6 |  | 112.1 | - |  | 0.609 |  | 0.08 |
|  |  | INTER(4w) | 110.9 | 108.7 |  | 113.1 | - |  |  | 109.5 | 107.2 |  | 111.7 | - |  | 0.363 |  | 0.14 |
|  |  | POST(8w) | 113.6 | 111.4 |  | 115.8 | - |  |  | 110.9 | 108.6 |  | 113.1 | - |  | 0.092 |  | 0.26 |
|  |  |  |  |  |  |  |  |  |  |  |  |  |  |  |  |  |  |  |
|  |  | Δ 4w | 1.9 | 0.0 |  | 3.8 | **0.049** | ** |  | -0.4 | -2.3 |  | 1.5 | 0.690 |  | 0.097 |  | 0.26 |
|  |  | Δ 8w | 4.5 | 2.7 |  | 6.4 | **0.000** | ****** |  | 1.0 | -0.9 |  | 2.9 | 0.301 |  | **0.010** | ** | 0.40 |
|  |  |  |  |  |  |  |  |  |  |  |  |  |  |  |  |  |  |  |
| Non-affected |  | PRE | 112.8 | 106.4 |  | 119.2 | - |  |  | 110.8 | 106.5 |  | 115.1 | - |  | 0.609 |  | 0.08 |
|  |  | INTER(4w) | 112.9 | 106.5 |  | 119.3 | - |  |  | 110.8 | 106.5 |  | 115.0 | - |  | 0.575 |  | 0.08 |
|  |  | POST(8w) | 113.7 | 107.3 |  | 120.1 | - |  |  | 112.1 | 107.8 |  | 116.4 | - |  | 0.674 |  | 0.06 |
|  |  |  |  |  |  |  |  |  |  |  |  |  |  |  |  |  |  |  |
|  |  | Δ 4w | 0.2 | -3.9 |  | 4.2 | 0.940 |  |  | 0.0 | -2.7 |  | 2.7 | 0.980 |  | 0.939 |  | 0.01 |
|  |  | Δ 8w | 0.9 | -3.1 |  | 5.0 | 0.651 |  |  | 1.3 | -1.4 |  | 4.0 | 0.352 |  | 0.886 |  | 0.02 |
| **GHQ** |  |  |  |  |  |  |  |  |  |  |  |  |  |  |  |  |  |  |
| Affected |  | PRE | 3.8 | 3.2 |  | 4.4 | - |  |  | 4.9 | 4.2 |  | 5.5 | - |  | 0.023 |  | 0.35 |
|  |  | INTER(4w) | 2.5 | 1.9 |  | 3.1 | - |  |  | 4.1 | 3.4 |  | 4.7 | - |  | 0.001 |  | 0.52 |
|  |  | POST(8w) | 1.7 | 1.1 |  | 2.4 | - |  |  | 3.8 | 3.2 |  | 4.5 | - |  | <0.001 |  | 0.70 |
|  |  |  |  |  |  |  |  |  |  |  |  |  |  |  |  |  |  |  |
|  |  | Δ 4w | -1.3 | -1.9 |  | -0.7 | **<0.001** | ** |  | -0.8 | -1.4 |  | -0.2 | **0.011** | * | 0.240 |  | 0.18 |
|  |  | Δ 8w | -2.1 | -2.7 |  | -1.5 | **<0.001** | ****** |  | -1.0 | -1.6 |  | -0.4 | **0.001** | ** | **0.019** | * | 0.36 |
|  |  |  |  |  |  |  |  |  |  |  |  |  |  |  |  |  |  |  |
| Non-affected |  | PRE | 5.3 | 3.7 |  | 6.9 | - |  |  | 2.9 | 1.8 |  | 4.0 | - |  | 0.018 |  | 0.37 |
|  |  | INTER(4w) | 2.8 | 1.1 |  | 4.4 | - |  |  | 3.0 | 1.9 |  | 4.1 | - |  | 0.787 |  | 0.04 |
|  |  | POST(8w) | 2.3 | 0.7 |  | 3.9 | - |  |  | 3.1 | 2.0 |  | 4.2 | - |  | 0.419 |  | 0.12 |
|  |  |  |  |  |  |  |  |  |  |  |  |  |  |  |  |  |  |  |
|  |  | Δ 4w | -2.5 | -4.1 |  | -1.0 | **0.001** | ** |  | -0.2 | -1.2 |  | 0.8 | 0.736 |  | **0.005** | ** | 0.39 |
|  |  | Δ 8w | -3.0 | -4.5 |  | -1.5 | **0.000** | ** |  | -0.1 | -1.1 |  | 0.9 | 0.893 |  | **0.001** | ** | 0.48 |
| **SWLS** |  |  |  |  |  |  |  |  |  |  |  |  |  |  |  |  |  |  |
| Affected |  | PRE | 22.6 | 21.5 |  | 23.7 | - |  |  | 21.6 | 20.4 |  | 22.7 | - |  | 0.176 |  | 0.21 |
|  |  | INTER(4w) | 23.4 | 22.3 |  | 24.5 | - |  |  | 21.6 | 20.5 |  | 22.7 | - |  | 0.025 |  | 0.35 |
|  |  | POST(8w) | 24.3 | 23.2 |  | 25.4 | - |  |  | 21.3 | 20.2 |  | 22.4 | - |  | **<0.001** | ** | 0.57 |
|  |  |  |  |  |  |  |  |  |  |  |  |  |  |  |  |  |  |  |
|  |  | Δ 4w | 0.7 | 0.0 |  | 1.5 | **0.063** | ** |  | 0.0 | -0.8 |  | 0.8 | 0.952 |  | 0.208 |  | 0.19 |
|  |  | Δ 8w | 1.6 | 0.9 |  | 2.4 | **<0.001** | ****** |  | -0.2 | -1.0 |  | 0.6 | 0.565 |  | 0.001 | ** | 0.51 |
|  |  |  |  |  |  |  |  |  |  |  |  |  |  |  |  |  |  |  |
| Non-affected |  | PRE | 20.8 | 17.7 |  | 24.0 | - |  |  | 22.4 | 20.3 |  | 24.6 | - |  | 0.403 |  | 0.13 |
|  |  | INTER(4w) | 22.2 | 19.0 |  | 25.3 | - |  |  | 22.9 | 20.8 |  | 25.0 | - |  | 0.698 |  | 0.06 |
|  |  | POST(8w) | 23.0 | 19.8 |  | 26.2 | - |  |  | 22.9 | 20.8 |  | 25.0 | - |  | 0.957 |  | 0.01 |
|  |  |  |  |  |  |  |  |  |  |  |  |  |  |  |  |  |  |  |
|  |  | Δ 4w | 1.3 | -1.0 |  | 3.6 | 0.259 |  |  | 0.4 | -1.1 |  | 2.0 | 0.562 |  | 0.537 |  | 0.09 |
|  |  | Δ 8w | 2.2 | -0.1 |  | 4.4 | 0.065 |  |  | 0.4 | -1.1 |  | 2.0 | 0.562 |  | 0.222 |  | 0.19 |
| **SIPQ** |  |  |  |  |  |  |  |  |  |  |  |  |  |  |  |  |  |  |
| Affected |  | PRE | 75.7 | 71.8 |  | 79.5 | - |  |  | 73.0 | 69.0 |  | 76.9 | - |  | 0.341 |  | 0.15 |
|  |  | INTER(4w) | 77.2 | 73.4 |  | 81.1 | - |  |  | 72.9 | 69.0 |  | 76.9 | - |  | 0.125 |  | 0.23 |
|  |  | POST(8w) | 79.3 | 75.4 |  | 83.1 | - |  |  | 72.4 | 68.4 |  | 76.3 | - |  | 0.015 |  | 0.38 |
|  |  |  |  |  |  |  |  |  |  |  |  |  |  |  |  |  |  |  |
|  |  | Δ 4w | 1.6 | -1.9 | , | 5.0 | 0.370 |  |  | -0.1 | -3.6 | , | 3.4 | 0.962 |  | 0.509 |  | 0.11 |
|  |  | Δ 8w | 3.6 | 0.2 | , | 7.0 | **0.039** | ****** |  | -0.6 | -4.1 | , | 2.9 | 0.727 |  | 0.091 |  | 0.26 |
|  |  |  |  |  |  |  |  |  |  |  |  |  |  |  |  |  |  |  |
| Non-affected |  | PRE | 74.6 | 64.2 |  | 85.1 | - |  |  | 78.3 | 71.3 |  | 85.3 | - |  | 0.649 |  | 0.09 |
|  |  | INTER(4w) | 71.5 | 61.1 |  | 82.0 | - |  |  | 78.2 | 71.2 |  | 85.2 | - |  | 0.391 |  | 0.16 |
|  |  | POST(8w) | 79.6 | 69.2 |  | 90.1 | - |  |  | 79.0 | 72.0 |  | 86.0 | - |  | **0.041** | * | 0.01 |
|  |  |  |  |  |  |  |  |  |  |  |  |  |  |  |  |  |  |  |
|  |  | Δ 4w | -3.1 | -14.0 | , | 7.8 | 0.577 |  |  | 0.0 | -7.3 | , | 7.3 | 0.993 |  | 0.640 |  | 0.07 |
|  |  | Δ 8w | 5.0 | -5.9 | , | 15.9 | 0.365 |  |  | 0.7 | -6.6 | , | 8.0 | 0.852 |  | 0.516 |  | 0.10 |

cThe effects of the intervention were measured and compared to the controls after 4 weeks and 8 weeks in each subject’s group affected or non-affected by COVID-19.

**p* < 0.05 and **p* < 0.01 compared to PRE or control group.
